# Supplementary material for: Ultrasensitive digital quantification of cytokines and bacteria predicts septic shock outcomes
Source: PubMed Central journal article supplement (PMC7248118; doi:10.1038/s41467-020-16124-9), 2020-05-25
Supplement: 41467_2020_16124_MOESM2_ESM.pdf [file 41467_2020_16124_MOESM2_ESM.pdf]

## **Description of Additional Supplementary Files**

File Name: Supplementary Software 1

Description: The R code used to perform the two-sided two-part statistics test.
